# Supplementary material for: Spectral interpretation of thermally irreversible recovery of poly(N-isopropylacrylamide-co-acrylic acid) hydrogel
Source: Royal Society of Chemistry journal article supplement (doi:10.1039/c0cp01939a), 2011-01-01
Supplement: c0cp01939a.pdf [file c0cp01939a.pdf]

*Supporting Information for*

# Spectral Interpretation of Thermally Irreversible Recovery of Poly(*N*-isopropylacrylamide-co-acrylic acid) Hydrogel

*Shengtong Sun, Jun Hu, Hui Tang and Peiyi Wu\**

The Key Laboratory of Molecular Engineering of Polymers, Ministry of Education, Department of  
Macromolecular Science, and Laboratory of Advanced Materials, Fudan University, Shanghai 200433,  
People's Republic of China

### S1: Determination of the Sequence Order of Major Bands for 2D Analysis

As mentioned above, the sequence of major bands in hydrogel can be summarized from the multiplication of correlation intensities in 2D synchronous and asynchronous spectra according to Noda's rule.<sup>43-44</sup> When the cross-peak  $\{\Phi(\nu_1, \nu_2)\}$  (assuming  $\nu_1 > \nu_2$ ) in synchronous spectra has the same symbol to the cross-peak  $\{\Psi(\nu_1, \nu_2)\}$  in asynchronous spectra, the response at band  $\nu_1$  should be prior to or earlier than that at band  $\nu_2$  and vice versa.

|      | 2987 | 2970 | 2943 | 2931 | 2927 | 2899 | 2883 | 2873 | 1728 | 1720 | 1713 | 1691 | 1687 | 1684 | 1653 | 1624 | 1601 |
|------|------|------|------|------|------|------|------|------|------|------|------|------|------|------|------|------|------|
| 2987 | -    | +    | +    | -    | -    | +    | -    | -    | -    | -    | -    | +    | +    | +    | -    | +    | +    |
| 2970 |      | +    | +    | -    | -    | +    | +    | +    | +    | +    | +    | +    | +    | +    | +    | +    | +    |
| 2943 |      |      | +    | -    | -    | +    | -    | -    | -    | -    | -    | -    | +    | +    | -    | +    | +    |
| 2931 |      |      |      | -    | -    | -    | -    | -    | -    | -    | -    | -    | -    | -    | -    | -    | -    |
| 2927 |      |      |      |      | +    | +    | +    | +    | +    | +    | +    | +    | +    | +    | +    | +    | +    |
| 2899 |      |      |      |      |      | +    | +    | +    | +    | +    | +    | +    | +    | +    | +    | +    | +    |
| 2883 |      |      |      |      |      |      | -    | -    | -    | -    | -    | -    | -    | -    | -    | -    | -    |
| 2873 |      |      |      |      |      |      |      | -    | -    | -    | -    | +    | +    | +    | +    | +    | +    |
| 1728 | 2927 | 2899 | 2970 | 2873 | 2987 | 2943 | 2883 | 2931 |      | +    | +    | +    | +    | +    | +    | +    | +    |
| 1720 |      |      |      |      |      |      |      |      |      | +    | +    | +    | +    | +    | +    | +    | +    |
| 1713 |      |      |      |      |      |      |      |      |      |      | -    | +    | +    | +    | +    | +    | +    |
| 1691 |      |      |      |      |      |      |      |      |      |      |      | +    | +    | +    | +    | +    | +    |
| 1687 |      |      |      |      |      |      |      |      |      |      |      |      | +    | +    | -    | +    | +    |
| 1684 |      |      |      |      |      |      |      |      |      |      |      |      |      | +    | -    | +    | -    |
| 1653 |      |      |      |      |      |      |      |      | 1728 | 1713 | 1720 | 1691 | 1687 | 1684 |      | +    | +    |
| 1624 |      |      |      |      |      |      |      |      |      |      |      |      |      |      |      |      | -    |
| 1601 |      |      |      |      |      |      |      |      |      |      |      |      |      |      |      |      |      |
|      |      |      |      |      |      |      |      |      |      |      |      |      |      |      | 1653 | 1601 | 1624 |
|      | 2927 | 2899 | 2970 | 1728 | 1713 | 1720 | 2873 | 1653 | 2987 | 1691 | 2943 | 1687 | 1601 | 1684 | 1624 | 2883 | 2931 |

**Figure S1.** Operation details of the sequence order determination in PNIPAM-co-AA hydrogel based on calculated results of 2D spectra during heating.

|      | 2989 | 2974 | 2968 | 2943 | 2939 | 2931 | 2926 | 2893 | 2885 | 2873 | 2848 | 1728 | 1714 | 1705 | 1699 | 1693 | 1687 | 1684 | 1655 | 1643 | 1639 | 1622 | 1605 |      |      |      |      |
|------|------|------|------|------|------|------|------|------|------|------|------|------|------|------|------|------|------|------|------|------|------|------|------|------|------|------|------|
| 2989 | +    | -    | +    | +    | +    | +    | +    | +    | +    | -    | +    | +    | -    | +    | -    | -    | +    | +    | -    | +    | +    | -    | +    |      |      |      |      |
| 2974 |      | -    | -    | -    | -    | -    | +    | -    | -    | -    | +    | -    | -    | -    | -    | -    | -    | -    | -    | +    | -    | -    | -    |      |      |      |      |
| 2968 |      |      | +    | +    | +    | +    | +    | +    | +    | +    | +    | +    | +    | +    | +    | +    | +    | +    | +    | +    | +    | +    | +    |      |      |      |      |
| 2943 |      |      |      | +    | +    | +    | +    | +    | +    | -    | +    | +    | -    | -    | -    | -    | -    | -    | -    | +    | -    | -    | -    |      |      |      |      |
| 2939 |      |      |      |      | +    | +    | +    | +    | +    | -    | +    | +    | -    | -    | -    | -    | -    | -    | -    | +    | -    | -    | -    |      |      |      |      |
| 2931 |      |      |      |      |      | +    | -    | -    | -    | -    | +    | -    | -    | -    | -    | -    | -    | -    | -    | +    | -    | -    | -    |      |      |      |      |
| 2926 |      |      |      |      |      |      | -    | -    | -    | -    | -    | -    | -    | -    | -    | -    | -    | -    | -    | -    | -    | -    | -    |      |      |      |      |
| 2893 |      |      |      |      |      |      |      | -    | -    | +    | -    | -    | -    | -    | -    | -    | -    | -    | -    | +    | -    | -    | -    |      |      |      |      |
| 2885 |      |      |      |      |      |      |      |      | -    | +    | +    | -    | -    | -    | -    | -    | -    | -    | -    | +    | -    | -    | -    |      |      |      |      |
| 2873 |      |      |      |      |      |      |      |      |      |      | +    | +    | +    | +    | +    | +    | +    | +    | +    | +    | +    | +    | +    |      |      |      |      |
| 2848 | 2968 | 2873 | 2989 | 2943 | 2939 | 2885 | 2893 | 2931 | 2974 | 2848 | 2926 | -    | -    | -    | -    | -    | -    | -    | -    | +    | -    | -    | -    |      |      |      |      |
| 1728 |      |      |      |      |      |      |      |      |      |      |      | -    | -    | -    | -    | -    | -    | -    | -    | +    | -    | -    | -    |      |      |      |      |
| 1714 |      |      |      |      |      |      |      |      |      |      |      |      | +    | -    | +    | +    | +    | +    | +    | +    | +    | +    | +    |      |      |      |      |
| 1705 |      |      |      |      |      |      |      |      |      |      |      |      |      | -    | -    | +    | -    | -    | +    | +    | -    | -    | -    |      |      |      |      |
| 1699 |      |      |      |      |      |      |      |      |      |      |      |      |      |      | +    | +    | +    | +    | +    | +    | +    | +    | +    |      |      |      |      |
| 1693 |      |      |      |      |      |      |      |      |      |      |      |      |      |      |      | +    | +    | -    | +    | +    | -    | +    |      |      |      |      |      |
| 1687 |      |      |      |      |      |      |      |      |      |      |      |      |      |      |      |      | -    | -    | +    | +    | -    | -    |      |      |      |      |      |
| 1684 |      |      |      |      |      |      |      |      |      |      |      | 1699 | 1693 | 1714 | 1684 | 1705 | 1687 | 1728 | -    | +    | +    | -    | +    |      |      |      |      |
| 1655 |      |      |      |      |      |      |      |      |      |      |      |      |      |      |      |      |      |      |      | +    | +    | +    | +    |      |      |      |      |
| 1643 |      |      |      |      |      |      |      |      |      |      |      |      |      |      |      |      |      |      |      |      | -    | -    | -    |      |      |      |      |
| 1639 |      |      |      |      |      |      |      |      |      |      |      |      |      |      |      |      |      |      |      |      |      | -    | -    |      |      |      |      |
| 1622 |      |      |      |      |      |      |      |      |      |      |      |      |      |      |      |      |      |      |      |      |      |      | +    |      |      |      |      |
| 1605 |      |      |      |      |      |      |      |      |      |      |      |      |      |      |      |      |      |      |      |      |      |      | 1655 | 1622 | 1605 | 1639 | 1643 |
|      | 2968 | 2873 | 1655 | 1622 | 1699 | 1693 | 1714 | 2989 | 1684 | 1605 | 1705 | 1687 | 1639 | 2943 | 2939 | 2885 | 2893 | 1728 | 2931 | 2974 | 2848 | 1643 | 2926 |      |      |      |      |

**Figure S2.** Operation details of the sequence order determination in PNIPAM-co-AA hydrogel based on calculated results of 2D spectra during cooling.
